# Supplementary material for: Multiscale modeling of heat and mass transfer in dry snow: influence of the condensation coefficient and comparison with experiments
Source: Copernicus journal article supplement (doi:10.5194/tc-18-4285-2024), 2024-09-19
Supplement: Supplementary file 1 [file tc-18-4285-2024-supplement.pdf]

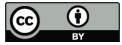

*Supplement of*

## **Multiscale modeling of heat and mass transfer in dry snow: influence of the condensation coefficient and comparison with experiments**

**Lisa Bouvet et al.**

*Correspondence to:* Lisa Bouvet ([lisa.bouvet@meteo.fr](mailto:lisa.bouvet@meteo.fr))

The copyright of individual parts of the supplement might differ from the article licence.

## S.1 Case A

Taking the order of magnitude of the dimensionless numbers into account,  $[F_i^T] = \mathcal{O}([F_a^T]) = \mathcal{O}([F_a^\rho]) = \mathcal{O}(\varepsilon^2)$ ,  $[K] = \mathcal{O}(1)$ ,  $[H] = \mathcal{O}(\varepsilon^2)$ ,  $[W_R] = \mathcal{O}(\varepsilon^2)$ , the dimensionless microscopic description (13)-(18) becomes:

$$\varepsilon^2 \rho_i^* C_i^* \frac{\partial T_i^*}{\partial t^*} - \text{div}^*(k_i^* \mathbf{grad}^* T_i^*) = 0 \quad \text{in } \Omega_i \quad (\text{S.A.1})$$

5

$$\varepsilon^2 \rho_a^* C_a^* \frac{\partial T_a^*}{\partial t^*} - \text{div}^*(k_a^* \mathbf{grad}^* T_a^*) = 0 \quad \text{in } \Omega_a \quad (\text{S.A.2})$$

$$\varepsilon^2 \frac{\partial \rho_v^*}{\partial t^*} - \text{div}^*(D_v^* \mathbf{grad}^* \rho_v^*) = 0 \quad \text{in } \Omega_a \quad (\text{S.A.3})$$

$$10 \quad T_i^* = T_a^* \quad \text{on } \Gamma \quad (\text{S.A.4})$$

$$k_i^* \mathbf{grad}^* T_i^* \cdot \mathbf{n}_i - k_a^* \mathbf{grad}^* T_a^* \cdot \mathbf{n}_i = \varepsilon^2 L_{sg}^* \mathbf{w}^* \cdot \mathbf{n}_i \quad \text{on } \Gamma \quad (\text{S.A.5})$$

$$D_v^* \mathbf{grad}^* \rho_v^* \cdot \mathbf{n}_i = \varepsilon^2 \rho_i^* \mathbf{w}^* \cdot \mathbf{n}_i \quad \text{on } \Gamma \quad (\text{S.A.6})$$

15 This set of equations is completed by the Hertz-Knudsen equation (10) and the Clausius Clapeyron's law (9) expressed in dimensionless form as:

$$w_n^* = \mathbf{w}^* \cdot \mathbf{n}_i = \frac{\alpha^*}{\rho_i^*} w_k^* [\rho_v^* - \rho_{vs}^*(T_a^*)] \quad \text{on } \Gamma \quad (\text{S.A.7})$$

$$\rho_{vs}^*(T_a^*) = \rho_{vs}^{\text{ref}*}(T^{\text{ref}*}) \exp \left[ \frac{L_{sg}^* m^*}{\rho_i^* k^*} \left( \frac{1}{T^{\text{ref}*}} - \frac{1}{T_a^*} \right) \right] \quad (\text{S.A.8})$$

### 20 S.1.1 Heat transfer

Introducing asymptotic expansions for  $T_i^*$  and  $T_a^*$  in the relations (S.A.1), (S.A.2), (S.A.4), (S.A.5) gives at the lowest order:

$$\text{div}_{y^*}(k_i^* \mathbf{grad}_{y^*} T_i^{*(0)}) = 0 \quad \text{in } \Omega_i \quad (\text{S.A.9})$$

$$\text{div}_{y^*}(k_a^* \mathbf{grad}_{y^*} T_a^{*(0)}) = 0 \quad \text{in } \Omega_a \quad (\text{S.A.10})$$

25

$$T_i^{*(0)} = T_a^{*(0)} \quad \text{on } \Gamma \quad (\text{S.A.11})$$

$$(k_i^* \mathbf{grad}_{y^*} T_i^{*(0)} - k_a^* \mathbf{grad}_{y^*} T_a^{*(0)}) \cdot \mathbf{n}_i = 0 \quad \text{on } \Gamma \quad (\text{S.A.12})$$

30 where the unknowns  $T_i^{*(0)}(\mathbf{x}^*, \mathbf{y}^*, t)$  and  $T_a^{*(0)}(\mathbf{x}^*, \mathbf{y}^*, t)$  are  $\mathbf{y}^*$ -periodic. It can be shown that the obvious solution of the above boundary value problem is given by:

$$T_i^{*(0)} = T_a^{*(0)} = T^{*(0)}(\mathbf{x}^*, t) \quad (\text{S.A.13})$$

At the first order, the temperature is independent of the microscopic dimensionless variable  $\mathbf{y}^*$ , i.e. we have only one temperature field. Taking these results into account, equations (S.A.1), (S.A.2), (S.A.4), and (S.A.5) of order  $\varepsilon$  give the following second-order problem:

$$35 \quad \text{div}_{\mathbf{y}^*} (k_i^* (\mathbf{grad}_{\mathbf{y}^*} T_i^{*(1)} + \mathbf{grad}_{\mathbf{x}^*} T^{*(0)})) = 0 \quad \text{in } \Omega_i \quad (\text{S.A.14})$$

$$\text{div}_{\mathbf{y}^*} (k_a^* (\mathbf{grad}_{\mathbf{y}^*} T_a^{*(1)} + \mathbf{grad}_{\mathbf{x}^*} T^{*(0)})) = 0 \quad \text{in } \Omega_a \quad (\text{S.A.15})$$

$$T_i^{*(1)} = T_a^{*(1)} \quad \text{on } \Gamma \quad (\text{S.A.16})$$

$$40 \quad (k_i^* (\mathbf{grad}_{\mathbf{y}^*} T_i^{*(1)} + \mathbf{grad}_{\mathbf{x}^*} T^{*(0)}) - k_a^* (\mathbf{grad}_{\mathbf{y}^*} T_a^{*(1)} + \mathbf{grad}_{\mathbf{x}^*} T^{*(0)})) \cdot \mathbf{n}_i = 0 \quad \text{on } \Gamma \quad (\text{S.A.17})$$

where the unknowns  $T_i^{*(1)}(\mathbf{x}^*, \mathbf{y}^*, t)$  and  $T_a^{*(1)}(\mathbf{x}^*, \mathbf{y}^*, t)$  are  $\mathbf{y}^*$ -periodic and the macroscopic gradient  $\mathbf{grad}_{\mathbf{x}^*} T^{*(0)}$  is given. The solution of the above boundary value problem appears as a linear function of the macroscopic gradient, modulo an arbitrary function  $\tilde{T}^{*(1)}(\mathbf{x}^*, t)$ :

$$45 \quad T_i^{*(1)}(\mathbf{x}^*, \mathbf{y}^*, t) = \mathbf{t}_i^*(\mathbf{y}^*) \cdot \mathbf{grad}_{\mathbf{x}^*} T^{*(0)} + \tilde{T}_i^{*(1)} \quad (\text{S.A.18})$$

$$T_a^{*(1)}(\mathbf{x}^*, \mathbf{y}^*, t) = \mathbf{t}_a^*(\mathbf{y}^*) \cdot \mathbf{grad}_{\mathbf{x}^*} T^{*(0)} + \tilde{T}_a^{*(1)} \quad (\text{S.A.19})$$

50 where  $\mathbf{t}_i^*(\mathbf{y}^*)$  and  $\mathbf{t}_a^*(\mathbf{y}^*)$  are two periodic vectors which characterize the fluctuation of temperature in both phases at the pore scale. Introducing (S.A.18) and (S.A.19) in the set (S.A.14)-(S.A.17), these two vectors are solution of the following boundary value problem, expressed in a compact form as:

$$\text{div}_{\mathbf{y}^*} (k_i^* (\mathbf{grad}_{\mathbf{y}^*} \mathbf{t}_i^* + \mathbf{I})) = 0 \quad \text{in } \Omega_i \quad (\text{S.A.20})$$

$$\text{div}_{\mathbf{y}^*} (k_a^* (\mathbf{grad}_{\mathbf{y}^*} \mathbf{t}_a^* + \mathbf{I})) = 0 \quad \text{in } \Omega_a \quad (\text{S.A.21})$$

$$55 \quad \mathbf{t}_i^* = \mathbf{t}_a^* \quad \text{on } \Gamma \quad (\text{S.A.22})$$

$$(k_i^* (\mathbf{grad}_{\mathbf{y}^*} \mathbf{t}_i^* + \mathbf{I}) - k_a^* (\mathbf{grad}_{\mathbf{y}^*} \mathbf{t}_a^* + \mathbf{I})) \cdot \mathbf{n}_i = 0 \quad \text{on } \Gamma \quad (\text{S.A.23})$$

$$\frac{1}{|\Omega|} \int_{\Omega} (\mathbf{t}_a^* + \mathbf{t}_i^*) d\Omega = \mathbf{0} \quad (\text{S.A.24})$$

60 This latter equation is introduced to ensure the uniqueness of the solution. Finally, the third order problem is given by the Eq. (S.A.1), (S.A.2), (S.A.4), and (S.A.5) of order  $\varepsilon^2$ :

$$\rho_i^* C_i^* \frac{\partial T^{*(0)}}{\partial t^*} - \text{div}_{y^*} (k_i^* (\mathbf{grad}_{y^*} T_i^{*(2)} + \mathbf{grad}_{x^*} T_i^{*(1)})) - \text{div}_{x^*} (k_i^* (\mathbf{grad}_{y^*} T_i^{*(1)} + \mathbf{grad}_{x^*} T^{*(0)})) = 0 \quad \text{in } \Omega_i \quad (\text{S.A.25})$$

$$\rho_a^* C_a^* \frac{\partial T^{*(0)}}{\partial t^*} - \text{div}_{y^*} (k_a^* (\mathbf{grad}_{y^*} T_a^{*(2)} + \mathbf{grad}_{x^*} T_a^{*(1)})) - \text{div}_{x^*} (k_a^* (\mathbf{grad}_{y^*} T_a^{*(1)} + \mathbf{grad}_{x^*} T^{*(0)})) = 0 \quad \text{in } \Omega_a \quad (\text{S.A.26})$$

65

$$T_i^{*(2)} = T_a^{*(2)} \quad \text{on } \Gamma \quad (\text{S.A.27})$$

$$(k_i^* (\mathbf{grad}_{y^*} T_i^{*(2)} + \mathbf{grad}_{x^*} T_i^{*(1)}) - k_a^* (\mathbf{grad}_{y^*} T_a^{*(2)} + \mathbf{grad}_{x^*} T_a^{*(1)})) \cdot \mathbf{n}_i = w_n^{*(0)} \quad \text{on } \Gamma \quad (\text{S.A.28})$$

70 where the unknowns  $T_i^{*(2)}(\mathbf{x}^*, \mathbf{y}^*, t)$  and  $T_a^{*(2)}(\mathbf{x}^*, \mathbf{y}^*, t)$  are  $\mathbf{y}^*$ -periodic and  $w_n^{*(0)}$  is the normal interface velocity due to the sublimation-deposition process given, at the zero order, by the Hertz-Knudsen equation (S.A.7) and the Clausius Clapeyron's law (S.A.8).

### S.1.2 Water vapor transfer

Introducing asymptotic expansions for  $\rho_v^*$  in the relations (S.A.3) and (S.A.6) gives at the lowest order:

$$\text{div}_{y^*} (D_v^* \mathbf{grad}_{y^*} \rho_v^{*(0)}) = 0 \quad \text{in } \Omega_a \quad (\text{S.A.29})$$

75

$$D_v^* \mathbf{grad}_{y^*} \rho_v^{*(0)} \cdot \mathbf{n}_i = 0 \quad \text{on } \Gamma \quad (\text{S.A.30})$$

where the unknown  $\rho_v^{*(0)}(\mathbf{x}^*, \mathbf{y}^*, t)$  is  $\mathbf{y}^*$ -periodic. It can be shown (Auriault et al., 2009) that the solution of the above boundary value problem is given by:

$$\rho_v^{*(0)} = \rho_v^{*(0)}(\mathbf{x}^*, t) \quad (\text{S.A.31})$$

80 At the first order, the water vapor density is independent of the microscopic dimensionless variable  $\mathbf{y}^*$ . Taking these results into account, the second-order problem is given by Eq. (S.A.3) and (S.A.6) of order  $\varepsilon$ , which are:

$$\text{div}_{y^*} (D_v^* (\mathbf{grad}_{y^*} \rho_v^{*(1)} + \mathbf{grad}_{x^*} \rho_v^{*(0)})) = 0 \quad \text{in } \Omega_a \quad (\text{S.A.32})$$

$$D_v^* (\mathbf{grad}_{y^*} \rho_v^{*(1)} + \mathbf{grad}_{x^*} \rho_v^{*(0)}) \cdot \mathbf{n}_i = 0 \quad \text{on } \Gamma \quad (\text{S.A.33})$$

85 where the unknown  $\rho_v^{*(1)}(\mathbf{x}^*, \mathbf{y}^*, t)$  is  $\mathbf{y}^*$ -periodic and the macroscopic gradient  $\mathbf{grad}_{x^*} \rho_v^{*(0)}$  is given. The solution of the above boundary value problem appears as a linear function of the macroscopic gradient, modulo an arbitrary function  $\tilde{\rho}_v^{*(1)}(\mathbf{x}^*, t)$  (Auriault et al., 2009):

$$\rho_v^{*(1)}(\mathbf{x}^*, \mathbf{y}^*, t) = \mathbf{g}_v^*(\mathbf{y}^*) \cdot \mathbf{grad}_{x^*} \rho_v^{*(0)} + \tilde{\rho}_v^{*(1)}(\mathbf{x}^*, t) \quad (\text{S.A.34})$$

where  $\mathbf{g}_v^*(\mathbf{y}^*)$  is a periodic vector which characterizes the fluctuation of water vapor density in the air phase at the pore scale. Introducing (S.A.34) in the set (S.A.32)-(S.A.33), this vector is solution of the following boundary value problem, expressed in a compact form:

$$\operatorname{div}_{\mathbf{y}^*}(D_v^*(\mathbf{grad}_{\mathbf{y}^*}\mathbf{g}_v^* + \mathbf{I})) = 0 \quad \text{in } \Omega_a \quad (\text{S.A.35})$$

$$D_v^*(\mathbf{grad}_{\mathbf{y}^*}\mathbf{g}_v^* + \mathbf{I}) \cdot \mathbf{n}_i = 0 \quad \text{on } \Gamma \quad (\text{S.A.36})$$

95

$$\frac{1}{|\Omega|} \int_{\Omega_a} \mathbf{g}_v^* d\Omega = \mathbf{0} \quad (\text{S.A.37})$$

This latter equation is introduced to ensure the uniqueness of the solution. Finally, the third order problem is given by Eq. (S.A.3) and (S.A.6) of order  $\varepsilon^2$ :

$$\frac{\partial \rho_v^{*(0)}}{\partial t^*} - \operatorname{div}_{\mathbf{y}^*}(D_v^*(\mathbf{grad}_{\mathbf{y}^*}\rho_v^{*(2)} + \mathbf{grad}_{x^*}\rho_v^{*(1)})) - \operatorname{div}_{x^*}(D_v^*(\mathbf{grad}_{\mathbf{y}^*}\rho_v^{*(1)} + \mathbf{grad}_{x^*}\rho_v^{*(0)})) = 0 \quad \text{in } \Omega_a \quad (\text{S.A.38})$$

100

$$D_v^*(\mathbf{grad}_{\mathbf{y}^*}\rho_v^{*(2)} + \mathbf{grad}_{x^*}\rho_v^{*(1)}) \cdot \mathbf{n}_i = w_n^{*(0)} \quad \text{on } \Gamma \quad (\text{S.A.39})$$

where the unknown  $\rho_v^{*(2)}(\mathbf{x}^*, \mathbf{y}^*, t)$  is  $\mathbf{y}^*$ -periodic and  $w_n^{*(0)}$  is the normal interface velocity due to the sublimation/deposition process given, at the zero order, by the Hertz-Knudsen equation (S.A.7) and the Clausius Clapeyron's law (S.A.8). Taking the above results into account, we have:

$$\rho_{vs}^*(T_a^*) = \rho_{vs}^{\text{ref}*}(T^{\text{ref}*}) \exp \left[ \frac{L_{sg}^* m^*}{\rho_i^* k^*} \left( \frac{1}{T^{\text{ref}*}} - \frac{1}{T^{*(0)}} \right) \right] \left( 1 + \varepsilon \frac{L_{sg}^* m^*}{\rho_i^* k^*} \frac{T_a^{*(1)}}{(T^{*(0)})^2} + \dots \right) \quad (\text{S.A.40})$$

This relation shows that the asymptotic development of the Clausius-Clapeyron's law is written:

$$\rho_{vs}^*(T_a^*) = \rho_{vs}^{*(0)}(\mathbf{x}^*, t) + \varepsilon \rho_{vs}^{*(1)}(\mathbf{x}^*, \mathbf{y}^*, t) + \dots \quad (\text{S.A.41})$$

where the first term  $\rho_{vs}^{*(0)}$ , which depends on  $T^{*(0)}(\mathbf{x}^*, t)$  only, is defined as:

$$\rho_{vs}^{*(0)}(T^{*(0)}) = \rho_{vs}^{\text{ref}*}(T^{\text{ref}*}) \exp \left[ \frac{L_{sg}^* m^*}{\rho_i^* k^*} \left( \frac{1}{T^{\text{ref}*}} - \frac{1}{T^{*(0)}} \right) \right] \quad (\text{S.A.42})$$

110 The relation (S.A.42) shows that the normal velocity  $w_n^{*(0)}$  arising in the interface condition (S.A.39) does not depend on  $\mathbf{y}^*$ . From (S.A.7),  $w_n^{*(0)}$  is also written:

$$w_n^{*(0)} = \frac{\alpha^*}{\rho_i^*} w_k^* \left[ \rho_v^{*(0)} - \rho_{vs}^{*(0)}(T^{*(0)}) \right] \quad (\text{S.A.43})$$

### S.1.3 Macroscopic description

Integrating (S.A.25) over  $\Omega_i$  and (S.A.26) over  $\Omega_a$ , and then using the divergence theorem, the periodicity condition, and the interface conditions (S.A.28) leads to the first order dimensionless description:

$$(\rho C)^{\text{eff}*} \frac{\partial T^{*(0)}}{\partial t^*} - \operatorname{div}_{x^*}(\mathbf{k}^{\text{eff}*} \mathbf{grad}_{x^*} T^{*(0)}) = \text{SSA}_{\vee} L_{sg}^* w_n^{*(0)} \quad (\text{S.A.44})$$

where  $SSA_V = |\Gamma|/|\Omega|$  is the specific surface area and where  $(\rho C)^{\text{eff}*}$  and  $\mathbf{k}^{\text{eff}*}$  are the dimensionless effective thermal capacity and the effective dimensionless thermal conductivity, respectively, defined as:

$$(\rho C)^{\text{eff}*} = (1 - \phi)\rho_i^* C_i^* + \phi\rho_a^* C_a^* \quad (\text{S.A.45})$$

120

$$\mathbf{k}^{\text{eff}*} = \frac{1}{|\Omega|} \left( \int_{\Omega_a} k_a^* (\mathbf{grad}_{y^*} \mathbf{t}_a^*(\mathbf{y}^*) + \mathbf{I}) d\Omega + \int_{\Omega_i} k_i^* (\mathbf{grad}_{y^*} \mathbf{t}_i^*(\mathbf{y}^*) + \mathbf{I}) d\Omega \right) \quad (\text{S.A.46})$$

where  $\phi$  is the porosity. Consequently, integrating (S.A.38) over  $\Omega_a$ , and then using the divergence theorem, the periodicity condition, and the interface conditions (S.A.39) leads to the first order dimensionless description:

$$\phi \frac{\partial \rho_v^{*(0)}}{\partial t} - \text{div}_{x^*} (\mathbf{D}^{\text{eff}*} \mathbf{grad}_{x^*} \rho_v^{*(0)}) = -SSA_V \rho_i^* w_n^{*(0)} \quad (\text{S.A.47})$$

125 where  $\mathbf{D}^{\text{eff}*}$  is the dimensionless effective diffusion tensor defined as:

$$\mathbf{D}^{\text{eff}*} = \frac{1}{|\Omega|} \int_{\Omega_a} D_v^* (\mathbf{grad}_{y^*} \mathbf{g}_v^*(\mathbf{y}^*) + \mathbf{I}) d\Omega \quad (\text{S.A.48})$$

## S.2 Case B

Taking into account the order of magnitude of the dimensionless numbers,  $[\mathbf{F}_i^T] = \mathcal{O}([\mathbf{F}_a^T]) = \mathcal{O}([\mathbf{F}_a^p]) = \mathcal{O}(\varepsilon^2)$ ,  $[\mathbf{K}] = \mathcal{O}(1)$ ,  $[\mathbf{H}] = \mathcal{O}(\varepsilon)$ ,  $[\mathbf{W}_R] = \mathcal{O}(\varepsilon)$ , the dimensionless microscopic description (13)-(18) becomes:

$$130 \quad \varepsilon^2 \rho_i^* C_i^* \frac{\partial T_i^*}{\partial t^*} - \text{div}^* (k_i^* \mathbf{grad}^* T_i^*) = 0 \quad \text{in } \Omega_i \quad (\text{S.B.1})$$

$$\varepsilon^2 \rho_a^* C_a^* \frac{\partial T_a^*}{\partial t^*} - \text{div}^* (k_a^* \mathbf{grad}^* T_a^*) = 0 \quad \text{in } \Omega_a \quad (\text{S.B.2})$$

$$\varepsilon^2 \frac{\partial \rho_v^*}{\partial t^*} - \text{div}^* (D_v^* \mathbf{grad}^* \rho_v^*) = 0 \quad \text{in } \Omega_a \quad (\text{S.B.3})$$

135

$$T_i^* = T_a^* \quad \text{on } \Gamma \quad (\text{S.B.4})$$

$$k_i^* \mathbf{grad}^* T_i^* \cdot \mathbf{n}_i - k_a^* \mathbf{grad}^* T_a^* \cdot \mathbf{n}_i = \varepsilon L_{sg}^* \mathbf{w}^* \cdot \mathbf{n}_i \quad \text{on } \Gamma \quad (\text{S.B.5})$$

$$140 \quad D_v^* \mathbf{grad}^* \rho_v^* \cdot \mathbf{n}_i = \varepsilon \rho_i^* \mathbf{w}^* \cdot \mathbf{n}_i \quad \text{on } \Gamma \quad (\text{S.B.6})$$

This set of equations is completed by the Hertz-Knudsen equation (10) and the Clausius Clapeyron's law (9) expressed in dimensionless form as:

$$w_n^* = \mathbf{w}^* \cdot \mathbf{n}_i = \frac{\alpha^*}{\rho_i^*} w_k^* [\rho_v^* - \rho_{vs}^*(T_a^*)] \quad \text{on } \Gamma \quad (\text{S.B.7})$$

$$145 \quad \rho_{vs}^*(T_a^*) = \rho_{vs}^{\text{ref}*}(T^{\text{ref}*}) \exp \left[ \frac{L_{sg}^* m^*}{\rho_i^* k^*} \left( \frac{1}{T^{\text{ref}*}} - \frac{1}{T_a^*} \right) \right] \quad (\text{S.B.8})$$

## S.2.1 Heat transfer

Introducing asymptotic expansions for  $T_i^*$  and  $T_a^*$  in the relations (S.B.1), (S.B.2), (S.B.4), and (S.B.5) gives at the lowest order:

$$\operatorname{div}_{y^*}(k_i^* \mathbf{grad}_{y^*} T_i^{*(0)}) = 0 \quad \text{in } \Omega_i \quad (\text{S.B.9})$$

150

$$\operatorname{div}_{y^*}(k_a^* \mathbf{grad}_{y^*} T_a^{*(0)}) = 0 \quad \text{in } \Omega_a \quad (\text{S.B.10})$$

$$T_i^{*(0)} = T_a^{*(0)} \quad \text{on } \Gamma \quad (\text{S.B.11})$$

$$155 \quad (k_i^* \mathbf{grad}_{y^*}^* T_i^{*(0)} - k_a^* \mathbf{grad}_{y^*}^* T_a^{*(0)}) \cdot \mathbf{n}_i = 0 \quad \text{on } \Gamma \quad (\text{S.B.12})$$

where the unknowns  $T_i^{*(0)}(\mathbf{x}^*, \mathbf{y}^*, t)$  and  $T_a^{*(0)}(\mathbf{x}^*, \mathbf{y}^*, t)$  are  $\mathbf{y}^*$ -periodic. It can be shown (Auriault et al., 2009) that the obvious solution of the above boundary value problem is given by:

$$T_i^{*(0)} = T_a^{*(0)} = T^{*(0)}(\mathbf{x}^*, t) \quad (\text{S.B.13})$$

At the first order, the temperature is independent of the microscopic dimensionless variable  $\mathbf{y}^*$ , i.e. we have only one temperature field. Taking these results into account, Eq. (S.B.1), (S.B.2), (S.B.4), and (S.B.5) of order  $\varepsilon$  give the following second-order problem:

160

$$\operatorname{div}_{y^*}(k_i^* (\mathbf{grad}_{y^*} T_i^{*(1)} + \mathbf{grad}_{x^*} T^{*(0)})) = 0 \quad \text{in } \Omega_i \quad (\text{S.B.14})$$

$$\operatorname{div}_{y^*}(k_a^* (\mathbf{grad}_{y^*} T_a^{*(1)} + \mathbf{grad}_{x^*} T^{*(0)})) = 0 \quad \text{in } \Omega_a \quad (\text{S.B.15})$$

165

$$T_i^{*(1)} = T_a^{*(1)} \quad \text{on } \Gamma \quad (\text{S.B.16})$$

$$(k_i^* (\mathbf{grad}_{y^*} T_i^{*(1)} + \mathbf{grad}_{x^*} T^{*(0)}) - k_a^* (\mathbf{grad}_{y^*} T_a^{*(1)} + \mathbf{grad}_{x^*} T^{*(0)})) \cdot \mathbf{n}_i = L_{sg}^* w_n^{*(0)} \quad \text{on } \Gamma \quad (\text{S.B.17})$$

where the unknowns  $T_i^{*(1)}(\mathbf{x}^*, \mathbf{y}^*, t)$  and  $T_a^{*(1)}(\mathbf{x}^*, \mathbf{y}^*, t)$  are  $\mathbf{y}^*$ -periodic and the macroscopic gradient  $\mathbf{grad}_{x^*} T^{*(0)}$  is given. Moreover, it can be shown that at the first order  $w_n^{*(0)} = 0$  (see S.B.37). As in the case A, the solution of the above boundary value problem appears as a linear function of the macroscopic gradient, modulo an arbitrary function  $\tilde{T}^{*(1)}(\mathbf{x}^*, t)$  (Auriault et al., 2009):

170

$$T_i^{*(1)}(\mathbf{x}^*, \mathbf{y}^*, t) = \mathbf{t}_i^*(\mathbf{y}^*) \cdot \mathbf{grad}_{x^*} T^{*(0)} + \tilde{T}_i^{*(1)} \quad (\text{S.B.18})$$

$$175 \quad T_a^{*(1)}(\mathbf{x}^*, \mathbf{y}^*, t) = \mathbf{t}_a^*(\mathbf{y}^*) \cdot \mathbf{grad}_{x^*} T^{*(0)} + \tilde{T}_a^{*(1)} \quad (\text{S.B.19})$$

where  $\mathbf{t}_i^*(\mathbf{y}^*)$  and  $\mathbf{t}_a^*(\mathbf{y}^*)$  are two periodic vectors which characterize the fluctuation of temperature in both phases at the pore scale. Introducing (S.B.18) and (S.B.19) in the set (S.B.14)-(S.B.17), these two vectors are solution of the following boundary value problem in a compact form:

$$\text{div}_{y^*}(k_i^*(\mathbf{grad}_{y^*}\mathbf{t}_i^* + \mathbf{I})) = 0 \quad \text{in } \Omega_i \quad (\text{S.B.20})$$

180

$$\text{div}_{y^*}(k_a^*(\mathbf{grad}_{y^*}\mathbf{t}_a^* + \mathbf{I})) = 0 \quad \text{in } \Omega_a \quad (\text{S.B.21})$$

$$\mathbf{t}_i^* = \mathbf{t}_a^* \quad \text{on } \Gamma \quad (\text{S.B.22})$$

$$185 \quad (k_i^*(\mathbf{grad}_{y^*}\mathbf{t}_i^* + \mathbf{I}) - k_a^*(\mathbf{grad}_{y^*}\mathbf{t}_a^* + \mathbf{I})) \cdot \mathbf{n}_i = 0 \quad \text{on } \Gamma \quad (\text{S.B.23})$$

$$\frac{1}{|\Omega|} \int_{\Omega} (\mathbf{t}_a^* + \mathbf{t}_i^*) d\Omega = \mathbf{0} \quad (\text{S.B.24})$$

This latter equation is introduced to ensure the uniqueness of the solution. Finally, the third order problem is given by Eq. (S.B.1), (S.B.2), (S.B.4), and (S.B.5) of order  $\varepsilon^2$ :

$$190 \quad \rho_i^* C_i^* \frac{\partial T^{*(0)}}{\partial t^*} - \text{div}_{y^*}(k_i^*(\mathbf{grad}_{y^*}T_i^{*(2)} + \mathbf{grad}_{x^*}T_i^{*(1)})) - \text{div}_{x^*}(k_i^*(\mathbf{grad}_{y^*}T_i^{*(1)} + \mathbf{grad}_{x^*}T^{*(0)})) = 0 \quad \text{in } \Omega_i \quad (\text{S.B.25})$$

$$\rho_a^* C_a^* \frac{\partial T^{*(0)}}{\partial t^*} - \text{div}_{y^*}(k_a^*(\mathbf{grad}_{y^*}T_a^{*(2)} + \mathbf{grad}_{x^*}T_a^{*(1)})) - \text{div}_{x^*}(k_a^*(\mathbf{grad}_{y^*}T_a^{*(1)} + \mathbf{grad}_{x^*}T^{*(0)})) = 0 \quad \text{in } \Omega_a \quad (\text{S.B.26})$$

$$T_i^{*(2)} = T_a^{*(2)} \quad \text{on } \Gamma \quad (\text{S.B.27})$$

195

$$(k_i^*(\mathbf{grad}_{y^*}T_i^{*(2)} + \mathbf{grad}_{x^*}T_i^{*(1)}) - k_a^*(\mathbf{grad}_{y^*}T_a^{*(2)} + \mathbf{grad}_{x^*}T_a^{*(1)})) \cdot \mathbf{n}_i = L_{sg}^* w_n^{*(1)} \quad \text{on } \Gamma \quad (\text{S.B.28})$$

where the unknowns  $T_i^{*(2)}(\mathbf{x}^*, \mathbf{y}^*, t)$  and  $T_a^{*(2)}(\mathbf{x}^*, \mathbf{y}^*, t)$  are  $\mathbf{y}^*$ -periodic. Integrating (S.B.25) over  $\Omega_i$  and (S.B.26) over  $\Omega_a$ , and then using the divergence theorem, the periodicity condition, and the boundary conditions (S.B.28) leads to the first order dimensionless description:

$$200 \quad (\rho C)^{\text{eff}*} \frac{\partial T^{*(0)}}{\partial t^*} - \text{div}_{x^*}(\mathbf{k}^{\text{eff}*} \mathbf{grad}_{x^*}T^{*(0)}) = \int_{\Gamma} L_{sg}^* w_n^{*(1)} dS = -L_{sg}^* \dot{\phi} \quad (\text{S.B.29})$$

where  $(\rho C)^{\text{eff}*}$  and  $\mathbf{k}^{\text{eff}*}$  are the dimensionless effective thermal capacity and the effective dimensionless thermal conductivity respectively, defined, as in the Case A, by:

$$(\rho C)^{\text{eff}*} = (1 - \phi)\rho_i^* C_i^* + \phi\rho_a^* C_a^* \quad (\text{S.B.30})$$

$$205 \quad \mathbf{k}^{\text{eff}*} = \frac{1}{|\Omega|} \left( \int_{\Omega_a} k_a^*(\mathbf{grad}_{y^*}\mathbf{t}_a^*(\mathbf{y}^*) + \mathbf{I}) d\Omega + \int_{\Omega_i} k_i^*(\mathbf{grad}_{y^*}\mathbf{t}_i^*(\mathbf{y}^*) + \mathbf{I}) d\Omega \right) \quad (\text{S.B.31})$$

where  $\phi$  is the porosity.



## S.2.2 Water vapor transfer

Introducing asymptotic expansions for  $\rho_v^*$  in the relations (S.B.3) and (S.B.6) gives at the lowest order:

$$\operatorname{div}_{y^*}(D_v^* \mathbf{grad}_{y^*} \rho_v^{*(0)}) = 0 \quad \text{in } \Omega_a \quad (\text{S.B.32})$$

210

$$D_v^* \mathbf{grad}_{y^*} \rho_v^{*(0)} \cdot \mathbf{n}_i = 0 \quad \text{on } \Gamma \quad (\text{S.B.33})$$

where the unknown  $\rho_v^{*(0)}(\mathbf{x}^*, \mathbf{y}^*, t)$  is  $\mathbf{y}^*$ -periodic. It can be shown (Auriault et al., 2009) that the solution of the above boundary value problem is given by:

$$\rho_v^{*(0)} = \rho_v^{*(0)}(\mathbf{x}^*, t) \quad (\text{S.B.34})$$

215 At the first order, the water vapor density is independent of the microscopic dimensionless variable  $\mathbf{y}^*$ . Taking these results into account, the second-order problem is given by Eq. (S.B.3) and (S.B.6) of order  $\varepsilon$ :

$$\operatorname{div}_{y^*}(D_v^*(\mathbf{grad}_{y^*} \rho_v^{*(1)} + \mathbf{grad}_{x^*} \rho_v^{*(0)})) = 0 \quad \text{in } \Omega_a \quad (\text{S.B.35})$$

$$D_v^*(\mathbf{grad}_{y^*} \rho_v^{*(1)} + \mathbf{grad}_{x^*} \rho_v^{*(0)}) \cdot \mathbf{n}_i = \alpha w_k \left[ \rho_v^{*(0)} - \rho_{vs}^{*(0)}(T^{*(0)}) \right] \quad \text{on } \Gamma \quad (\text{S.B.36})$$

220 where the unknown  $\rho_v^{*(1)}(\mathbf{x}^*, \mathbf{y}^*, t)$  is  $\mathbf{y}^*$ -periodic. Consequently, integrating (S.B.35) over  $\Omega_a$ , and then using the divergence theorem, the periodicity condition, the interface conditions (S.B.36) and the result (S.B.34) leads to the first order dimensionless description:

$$\rho_v^{*(0)} = \rho_{vs}^{*(0)}(T^{*(0)}) \quad (\text{S.B.37})$$

225 Consequently, as in the Case A, the solution of the above boundary value problem (S.B.35) - (S.B.36) appears as a linear function of the macroscopic gradient  $\mathbf{grad}_{x^*} \rho_{vs}^{*(0)}(T^{*(0)})$  modulo an arbitrary function  $\tilde{\rho}_v^{*(1)}(\mathbf{x}^*, t)$ :

$$\rho_v^{*(1)}(\mathbf{x}^*, \mathbf{y}^*, t) = \mathbf{g}_v^*(\mathbf{y}^*) \cdot \mathbf{grad}_{x^*} \rho_{vs}^{*(0)}(T^{*(0)}) + \tilde{\rho}_v^{*(1)}(\mathbf{x}^*, t) \quad (\text{S.B.38})$$

where  $\mathbf{g}_v^*(\mathbf{y}^*)$  is a periodic vector which characterizes the fluctuation of water vapor density in the air phase at the pore scale induced by the macroscopic gradient  $\mathbf{grad}_{x^*} \rho_{vs}^{*(0)}(T^{*(0)})$ . Introducing (S.B.38) in the set (S.B.35)-(S.B.36), this vector is solution of the following boundary value problem in a compact form:

$$230 \operatorname{div}_{y^*}(D_v^*(\mathbf{grad}_{y^*} \mathbf{g}_v^* + \mathbf{I})) = 0 \quad \text{in } \Omega_a \quad (\text{S.B.39})$$

$$D_v^*(\mathbf{grad}_{y^*} \mathbf{g}_v^* + \mathbf{I}) \cdot \mathbf{n}_i = 0 \quad \text{on } \Gamma \quad (\text{S.B.40})$$

$$\frac{1}{|\Omega|} \int_{\Omega_a} \mathbf{g}_v^* d\Omega = \mathbf{0} \quad (\text{S.B.41})$$

235 This latter equation is introduced to ensure the uniqueness of the solution. Finally, the third order problem is given by Eq. (S.B.3) and (S.B.6) of order  $\varepsilon^2$ :

$$\frac{\partial \rho_{vs}^{*(0)}}{\partial t^*} - \operatorname{div}_{y^*}(D_v^*(\mathbf{grad}_{y^*} \rho_v^{*(2)} + \mathbf{grad}_{x^*} \rho_v^{*(1)})) - \operatorname{div}_{x^*}(D_v^*(\mathbf{grad}_{y^*} \rho_v^{*(1)} + \mathbf{grad}_{x^*} \rho_{vs}^{*(0)}(T^{*(0)}))) = 0 \quad \text{in } \Omega_i \quad (\text{S.B.42})$$

$$D_v^*(\mathbf{grad}_{y^*} \rho_v^{*(2)} + \mathbf{grad}_{x^*} \rho_v^{*(1)}) \cdot \mathbf{n}_i = \rho_i^* w_n^{*(1)} \quad \text{on } \Gamma \quad (\text{S.B.43})$$

240 where the unknowns  $\rho_v^{*(2)}(\mathbf{x}^*, \mathbf{y}^*, t)$  is  $\mathbf{y}^*$ -periodic and  $w_n^{*(1)}$  is the normal interface velocity due to the sublimation/deposition process at the first order. Consequently, integrating (S.B.42) over  $\Omega_a$ , and then using the divergence theorem, the periodicity condition, and the boundary conditions (S.B.43) leads to the first order dimensionless description:

$$\phi \frac{\partial \rho_{vs}^{*(0)}}{\partial t} - \text{div}_{x^*}(\mathbf{D}^{\text{eff}*} \mathbf{grad}_{x^*} \rho_{vs}^{*(0)}(T^{*(0)})) = \int_{\Gamma} \rho_i^* w_n^{*(1)} dS = \rho_i^* \dot{\phi} \quad (\text{S.B.44})$$

where  $\mathbf{D}^{\text{eff}*}$  is the classical dimensionless effective diffusion tensor defined as (see Case A):

$$245 \quad \mathbf{D}^{\text{eff}*} = \frac{1}{|\Omega|} \int_{\Omega_a} D_v^*(\mathbf{grad}_{y^*} \mathbf{g}_v^*(\mathbf{y}^*) + \mathbf{I}) d\Omega \quad (\text{S.B.45})$$

### S.3 Case C

Taking into account the order of magnitude of the dimensionless numbers,  $[\mathbf{F}_i^T] = \mathcal{O}([\mathbf{F}_a^T]) = \mathcal{O}([\mathbf{F}_a^{\rho}]) = \mathcal{O}(\varepsilon^2)$ ,  $[\mathbf{K}] = \mathcal{O}(1)$ ,  $[\mathbf{H}] = \mathcal{O}(1)$ ,  $[\mathbf{W}_R] = \mathcal{O}(1)$ , the dimensionless microscopic description (13)-(18) becomes:

$$\varepsilon^2 \rho_i^* C_i^* \frac{\partial T_i^*}{\partial t^*} - \text{div}^*(k_i^* \mathbf{grad}^* T_i^*) = 0 \quad \text{in } \Omega_i \quad (\text{S.C.1})$$

250

$$\varepsilon^2 \rho_a^* C_a^* \frac{\partial T_a^*}{\partial t^*} - \text{div}^*(k_a^* \mathbf{grad}^* T_a^*) = 0 \quad \text{in } \Omega_a \quad (\text{S.C.2})$$

$$\varepsilon^2 \frac{\partial \rho_v^*}{\partial t^*} - \text{div}^*(D_v^* \mathbf{grad}^* \rho_v^*) = 0 \quad \text{in } \Omega_a \quad (\text{S.C.3})$$

$$255 \quad T_i^* = T_a^* \quad \text{on } \Gamma \quad (\text{S.C.4})$$

$$k_i^* \mathbf{grad}^* T_i^* \cdot \mathbf{n}_i - k_a^* \mathbf{grad}^* T_a^* \cdot \mathbf{n}_i = L_{sg}^* \frac{D_v^*}{\rho_i^*} \mathbf{grad}^* \rho_v^* \cdot \mathbf{n}_i \quad \text{on } \Gamma \quad (\text{S.C.5})$$

$$D_v^* \mathbf{grad}^* \rho_v^* \cdot \mathbf{n}_i = \rho_i^* \mathbf{w}^* \cdot \mathbf{n}_i \quad \text{on } \Gamma \quad (\text{S.C.6})$$

260 This set of equations is completed by the Hertz-Knudsen equation (10) and the Clausius Clapeyron's law (9) expressed in dimensionless form as:

$$w_n^* = \mathbf{w}^* \cdot \mathbf{n}_i = \frac{\alpha^*}{\rho_i^*} w_k^* [\rho_v^* - \rho_{vs}^*(T_a^*)] \quad \text{on } \Gamma \quad (\text{S.C.7})$$

$$\rho_{vs}^*(T_a^*) = \rho_{vs}^{\text{ref}*}(T^{\text{ref}*}) \exp \left[ \frac{L_{sg}^* m^*}{\rho_i^* k^*} \left( \frac{1}{T^{\text{ref}*}} - \frac{1}{T_a^*} \right) \right] \quad (\text{S.C.8})$$

### 265 S.3.1 Heat and water vapor transfer at the first order

Introducing asymptotic expansions for  $T_i^*$  and  $T_a^*$  in the relations (S.C.1), (S.C.2), (S.C.4), and (S.C.5) gives at the lowest order:

$$\operatorname{div}_{y^*}(k_i^* \mathbf{grad}_{y^*} T_i^{*(0)}) = 0 \quad \text{in } \Omega_i \quad (\text{S.C.9})$$

$$270 \quad \operatorname{div}_{y^*}(k_a^* \mathbf{grad}_{y^*} T_a^{*(0)}) = 0 \quad \text{in } \Omega_a \quad (\text{S.C.10})$$

$$T_i^{*(0)} = T_a^{*(0)} \quad \text{on } \Gamma \quad (\text{S.C.11})$$

$$(k_i^* \mathbf{grad}_{y^*} T_i^{*(0)} - k_a^* \mathbf{grad}_{y^*} T_a^{*(0)}) \cdot \mathbf{n}_i = \frac{L_{sg}^*}{\rho_i^*} D_v^* \mathbf{grad}_{y^*} \rho_v^{*(0)} \cdot \mathbf{n}_i \quad \text{on } \Gamma \quad (\text{S.C.12})$$

275 where the unknowns  $T_i^{*(0)}(\mathbf{x}^*, \mathbf{y}^*, t)$  and  $T_a^{*(0)}(\mathbf{x}^*, \mathbf{y}^*, t)$  are  $\mathbf{y}^*$ -periodic. Introducing asymptotic expansions for  $\rho_v^*$  in the relations (S.C.3) and (S.C.6) gives at the lowest order:

$$\operatorname{div}_{y^*}(D_v^* \mathbf{grad}_{y^*} \rho_v^{*(0)}) = 0 \quad \text{in } \Omega_a \quad (\text{S.C.13})$$

$$D_v^* \mathbf{grad}_{y^*} \rho_v^{*(0)} \cdot \mathbf{n}_i = \alpha^* w_k \left[ \rho_v^{*(0)} - \rho_{vs}^{*(0)}(T^{*(0)}) \right] \quad \text{on } \Gamma \quad (\text{S.C.14})$$

280 where the unknown  $\rho_v^{*(0)}(\mathbf{x}^*, \mathbf{y}^*, t)$  is  $\mathbf{y}^*$ -periodic. Consequently, integrating (S.C.13) over  $\Omega_a$ , and then using the divergence theorem, the periodicity condition, the interface conditions (S.C.14) leads to:

$$\int_{\Gamma} (\rho_v^{*(0)} - \rho_{vs}^{*(0)}) d\Gamma = 0 \quad (\text{S.C.15})$$

Taking this result into account, the solution of the above boundary value problem is given by:

$$T_i^{*(0)} = T_a^{*(0)} = T^{*(0)}(\mathbf{x}^*, t) \quad (\text{S.C.16})$$

285 and

$$\rho_v^{*(0)} = \rho_v^{*(0)}(\mathbf{x}^*, t) = \rho_{vs}^{*(0)}(T^{*(0)}) \quad (\text{S.C.17})$$

At the first order, the temperature and the the water vapor density are independent of the microscopic dimensionless variable  $\mathbf{y}^*$ , i.e. we have only one temperature field.

### S.3.2 Heat and water vapor transfer at the second order

290 Taking these results into account, Eq. (S.C.1), (S.C.2), (S.C.4), and (S.C.5) of order  $\varepsilon$  give the following second-order problem:

$$\operatorname{div}_{y^*}(k_i^* (\mathbf{grad}_{y^*} T_i^{*(1)} + \mathbf{grad}_{x^*} T^{*(0)})) = 0 \quad \text{in } \Omega_i \quad (\text{S.C.18})$$

$$\operatorname{div}_{y^*}(k_a^*(\mathbf{grad}_{y^*}T_a^{*(1)} + \mathbf{grad}_{x^*}T^{*(0)})) = 0 \quad \text{in } \Omega_a \quad (\text{S.C.19})$$

295

$$T_i^{*(1)} = T_a^{*(1)} \quad \text{on } \Gamma \quad (\text{S.C.20})$$

$$(k_i^*(\mathbf{grad}_{y^*}T_i^{*(1)} + \mathbf{grad}_{x^*}T^{*(0)}) - k_a^*(\mathbf{grad}_{y^*}T_a^{*(1)} + \mathbf{grad}_{x^*}T^{*(0)})) \cdot \mathbf{n}_i = \quad (\text{S.C.21})$$

300

$$\frac{L_{sg}^*}{\rho_i^*} D_v^*(\mathbf{grad}_{y^*}\rho_v^{*(1)} + \mathbf{grad}_{x^*}\rho_v^{*(0)}) \cdot \mathbf{n}_i \quad \text{on } \Gamma$$

where the unknowns  $T_i^{*(1)}(\mathbf{x}^*, \mathbf{y}^*, t)$  and  $T_a^{*(1)}(\mathbf{x}^*, \mathbf{y}^*, t)$  are  $\mathbf{y}^*$ -periodic and the macroscopic gradient  $\mathbf{grad}_{x^*}T^{*(0)}$  is given. The second-order problem for the water vapor is given by Eq. (S.C.3) and (S.C.6) of order  $\varepsilon$ :

$$\operatorname{div}_{y^*}(D_v^*(\mathbf{grad}_{y^*}\rho_v^{*(1)} + \mathbf{grad}_{x^*}\rho_v^{*(0)})) = 0 \quad \text{in } \Omega_a \quad (\text{S.C.22})$$

305

$$D_v^*(\mathbf{grad}_{y^*}\rho_v^{*(1)} + \mathbf{grad}_{x^*}\rho_v^{*(0)}) \cdot \mathbf{n}_i = \alpha^* w_k^* [\rho_v^{*(1)} - \rho_{vs}^{*(1)}] \quad \text{on } \Gamma \quad (\text{S.C.23})$$

where the unknowns  $\rho_v^{*(1)}(\mathbf{x}^*, \mathbf{y}^*, t)$  is  $\mathbf{y}^*$ -periodic. Consequently, integrating (S.C.22) over  $\Omega_a$ , and then using the divergence theorem, the periodicity condition, the boundary conditions (S.C.23) leads to:

$$\int_{\Gamma} (\rho_v^{*(1)} - \rho_{vs}^{*(1)}) d\Gamma = 0 \quad (\text{S.C.24})$$

310

The solution of the above boundary value problem for the temperature appears as a linear function of the macroscopic gradient, modulo an arbitrary function  $\tilde{T}^{*(1)}(\mathbf{x}^*, t)$ :

$$T_i^{*(1)}(\mathbf{x}^*, \mathbf{y}^*, t) = \mathbf{s}_i^*(\mathbf{y}^*) \cdot \mathbf{grad}_{x^*}T^{*(0)} + \tilde{T}_i^{*(1)} \quad (\text{S.C.25})$$

$$T_a^{*(1)}(\mathbf{x}^*, \mathbf{y}^*, t) = \mathbf{s}_a^*(\mathbf{y}^*) \cdot \mathbf{grad}_{x^*}T^{*(0)} + \tilde{T}_a^{*(1)} \quad (\text{S.C.26})$$

Similarly, we have

$$\rho_v^{*(1)}(\mathbf{x}^*, \mathbf{y}^*, t) - \rho_{vs}^{*(1)}(\mathbf{x}^*, \mathbf{y}^*, t) = \gamma^*(T^{*(0)}) \mathbf{d}^*(\mathbf{y}^*) \cdot \mathbf{grad}_{x^*}T^{*(0)} \quad (\text{S.C.27})$$

with, according to (S.A.40),

$$\rho_{vs}^{*(1)} = \gamma^*(T^{*(0)}) \mathbf{s}_a^*(\mathbf{y}^*) \cdot \mathbf{grad}_{x^*}T^{*(0)} \quad (\text{S.C.28})$$

Thus,

$$\rho_v^{*(1)}(\mathbf{x}^*, \mathbf{y}^*, t) = \gamma^*(T^{*(0)}) (\mathbf{d}^*(\mathbf{y}^*) + \mathbf{s}_a^*(\mathbf{y}^*)) \cdot \mathbf{grad}_{x^*}T^{*(0)} \quad (\text{S.C.29})$$

320

where  $\mathbf{s}_i^*(\mathbf{y}^*)$ ,  $\mathbf{s}_a^*(\mathbf{y}^*)$  and  $\mathbf{d}^*(\mathbf{y}^*)$  are periodic vectors which characterize the fluctuation of temperature and the water vapor at the pore scale. Introducing (S.C.29), (S.C.26) and (S.C.29) in the set (S.C.18)-(S.C.23), these vectors are solution of the following boundary value problem in a compact form:

$$\operatorname{div}_{y^*}(k_i^*(\mathbf{grad}_{y^*}\mathbf{s}_i^* + \mathbf{I})) = 0 \quad \text{in } \Omega_i \quad (\text{S.C.30})$$

$$325 \quad \operatorname{div}_{y^*}(k_a^*(\mathbf{grad}_{y^*}\mathbf{s}_a^* + \mathbf{I})) = 0 \quad \text{in } \Omega_a \quad (\text{S.C.31})$$

$$\mathbf{s}_i^* = \mathbf{s}_a^* \quad \text{on } \Gamma \quad (\text{S.C.32})$$

$$(k_i^*(\mathbf{grad}_{y^*}\mathbf{s}_i^* + \mathbf{I}) - k_a^*(\mathbf{grad}_{y^*}\mathbf{s}_a^* + \mathbf{I})) \cdot \mathbf{n}_i = \frac{L_{sg}^*}{\rho_i^*} \alpha^* w_k^* \gamma^*(T^{*(0)}) \mathbf{d}^* \quad \text{on } \Gamma \quad (\text{S.C.33})$$

330

$$\operatorname{div}_{y^*}(D_v^*(\mathbf{grad}_{y^*}(\mathbf{d}^* + \mathbf{s}_a^*) + \mathbf{I})) = 0 \quad \text{in } \Omega_a \quad (\text{S.C.34})$$

$$D_v^*(\mathbf{grad}_{y^*}(\mathbf{d}^* + \mathbf{s}_a^*) + \mathbf{I}) \cdot \mathbf{n}_i = \alpha^* w_k^* \mathbf{d}^* \quad \text{on } \Gamma \quad (\text{S.C.35})$$

with

$$335 \quad \frac{1}{|\Omega|} \int_{\Omega} (\mathbf{s}_a^* + \mathbf{s}_i^*) d\Omega = \mathbf{0} \quad (\text{S.C.36})$$

$$\frac{1}{|\Omega|} \int_{\Gamma} \mathbf{d}^* d\Gamma = \mathbf{0} \quad (\text{S.C.37})$$

340 to ensure the unicity of the solution. Let us remark that the vectors  $\mathbf{s}_i^*(\mathbf{y}^*)$ ,  $\mathbf{s}_a^*(\mathbf{y}^*)$  and  $\mathbf{d}^*(\mathbf{y}^*)$  depend on the value  $\alpha$ . This model is valid for  $[\mathbf{W}_R] = \mathcal{O}(1)$ , i.e  $\varepsilon^{1/2} < [\mathbf{W}_R] < \varepsilon^{-1/2}$ . This implies that  $(\varepsilon^{1/2} D_{vc}/(lw_{kc})) = \alpha_{\min} < \alpha < \alpha_{\max} = (\varepsilon^{-1/2} D_{vc}/(lw_{kc}))$ .

### S.3.3 Macroscopic description

Finally, the third order problem for the heat transfer is given by Eq. (S.C.1), (S.C.2), (S.C.4), and (S.C.5) of order  $\varepsilon^2$ :

$$\rho_i^* C_i^* \frac{\partial T^{*(0)}}{\partial t^*} - \operatorname{div}_{y^*}(k_i^*(\mathbf{grad}_{y^*}T_i^{*(2)} + \mathbf{grad}_{x^*}T_i^{*(1)})) - \operatorname{div}_{x^*}(k_i^*(\mathbf{grad}_{y^*}T_i^{*(1)} + \mathbf{grad}_{x^*}T^{*(0)})) = 0 \quad \text{in } \Omega_i \quad (\text{S.C.38})$$

$$345 \quad \rho_a^* C_a^* \frac{\partial T^{*(0)}}{\partial t^*} - \operatorname{div}_{y^*}(k_a^*(\mathbf{grad}_{y^*}T_a^{*(2)} + \mathbf{grad}_{x^*}T_a^{*(1)})) - \operatorname{div}_{x^*}(k_a^*(\mathbf{grad}_{y^*}T_a^{*(1)} + \mathbf{grad}_{x^*}T^{*(0)})) = 0 \quad \text{in } \Omega_a \quad (\text{S.C.39})$$

$$T_i^{*(2)} = T_a^{*(2)} \quad \text{on } \Gamma \quad (\text{S.C.40})$$

$$350 \quad (k_i^*(\mathbf{grad}_{y^*}T_i^{*(2)} + \mathbf{grad}_{x^*}T_i^{*(1)}) - k_a^*(\mathbf{grad}_{y^*}T_a^{*(2)} + \mathbf{grad}_{x^*}T_a^{*(1)})) \cdot \mathbf{n}_i = \quad (\text{S.C.41})$$

$$L_{sg}^* \frac{D_v^*}{\rho_i^*} (\mathbf{grad}_{y^*}\rho_v^{*(2)} + \mathbf{grad}_{x^*}\rho_v^{*(1)}) \cdot \mathbf{n}_i \quad \text{on } \Gamma$$

where the unknowns  $T_i^{*(2)}(\mathbf{x}^*, \mathbf{y}^*, t)$  and  $T_a^{*(2)}(\mathbf{x}^*, \mathbf{y}^*, t)$  are  $\mathbf{y}^*$ -periodic. Integrating (S.C.38) over  $\Omega_i$  and (S.C.39) over  $\Omega_a$ , and then using the divergence theorem, the periodicity condition, the interface conditions (S.C.41) and the results leads to the first order dimensionless description:

$$355 \quad (\rho C)^{\text{eff}*} \frac{\partial T^{*(0)}}{\partial t^*} - \text{div}_{x^*}(\mathbf{k}^{C*} \mathbf{grad}_{x^*} T^{*(0)}) = - \int_{\Gamma} L_{sg}^* w_n^{*(2)} dS = L_{sg}^* \dot{\phi} \quad (\text{S.C.42})$$

where  $(\rho C)^{\text{eff}*}$  and  $\mathbf{k}^{C*}$  are the dimensionless effective thermal capacity and the effective dimensionless thermal conductivity respectively, defined as:

$$(\rho C)^{\text{eff}*} = (1 - \phi) \rho_i^* C_i^* + \phi \rho_a^* C_a^* \quad (\text{S.C.43})$$

$$360 \quad \mathbf{k}^{C*} = \frac{1}{|\Omega|} \left( \int_{\Omega_a} k_a^* (\mathbf{grad}_{y^*} \mathbf{s}_a^*(\mathbf{y}^*) + \mathbf{I}) d\Omega + \int_{\Omega_i} k_i^* (\mathbf{grad}_{y^*} \mathbf{s}_i^*(\mathbf{y}^*) + \mathbf{I}) d\Omega \right) \quad (\text{S.C.44})$$

where  $\phi$  is the porosity.

Finally, the third order problem for the water vapor is given by Eq. (S.C.3) and (S.C.6) of order  $\varepsilon^2$ :

$$\frac{\partial \rho_{vs}^{*(0)}}{\partial t^*} - \text{div}_{y^*} (D_v^* (\mathbf{grad}_{y^*} \rho_v^{*(2)} + \mathbf{grad}_{x^*} \rho_v^{*(1)})) - \text{div}_{x^*} (D_v^* (\mathbf{grad}_{y^*} \rho_v^{*(1)} + \mathbf{grad}_{x^*} \rho_{vs}^{*(0)} (T^{*(0)}))) = 0 \quad \text{in } \Omega_i \quad (\text{S.C.45})$$

$$365 \quad D_v^* (\mathbf{grad}_{y^*} \rho_v^{*(2)} + \mathbf{grad}_{x^*} \rho_v^{*(1)}) \cdot \mathbf{n}_i = \rho_i^* w_n^{*(2)} \quad \text{on } \Gamma \quad (\text{S.C.46})$$

where the unknown  $\rho_v^{*(2)}(\mathbf{x}^*, \mathbf{y}^*, t)$  is  $\mathbf{y}^*$ -periodic and  $w_n^{*(2)}$  is the normal interface velocity due to the sublimation/deposition process at the first order. Consequently, integrating (S.C.45) over  $\Omega_a$ , and then using the divergence theorem, the periodicity condition, and the interface conditions (S.C.46) leads to the first order dimensionless description:

$$\phi \frac{\partial \rho_{vs}^{*(0)}}{\partial t} - \text{div}_{x^*} (\mathbf{D}^{C*} \mathbf{grad}_{x^*} \rho_{vs}^{*(0)} (T^{*(0)})) = \int_{\Gamma} \rho_i^* w_n^{*(2)} dS = \rho_i^* \dot{\phi} \quad (\text{S.C.47})$$

370 where  $\mathbf{D}^{C*}$  is the classical dimensionless effective diffusion tensor defined as:

$$\mathbf{D}^{C*} = \frac{1}{|\Omega|} \int_{\Omega_a} D_v^* (\mathbf{grad}_{y^*} (\mathbf{d}^* + \mathbf{s}_a^*) + \mathbf{I}) d\Omega \quad (\text{S.C.48})$$

## S.4 Cases D1 and D2

### S.4.1 Case D1

375 Taking into account the order of magnitude of the dimensionless numbers,  $[F_i^T] = \mathcal{O}([F_a^T]) = \mathcal{O}([F_{al}^\rho]) = \mathcal{O}(\varepsilon^2)$ ,  $[K] = \mathcal{O}(1)$ ,  $[W_R] = \mathcal{O}(\varepsilon^{-1})$ ,  $[H] = \mathcal{O}(1)$ , the dimensionless microscopic description (13)-(18) becomes:

$$\varepsilon^2 \rho_i^* C_i^* \frac{\partial T_i^*}{\partial t^*} - \text{div}^* (k_i^* \mathbf{grad}^* T_i^*) = 0 \quad \text{in } \Omega_i \quad (\text{S.D1.1})$$

$$\varepsilon^2 \rho_a^* C_a^* \frac{\partial T_a^*}{\partial t^*} - \text{div}^*(k_a^* \mathbf{grad} T_a^*) = 0 \quad \text{in } \Omega_a \quad (\text{S.D1.2})$$

$$380 \quad \varepsilon^2 \frac{\partial \rho_v^*}{\partial t^*} - \text{div}^*(D_v^* \mathbf{grad}^* \rho_v^*) = 0 \quad \text{in } \Omega_a \quad (\text{S.D1.3})$$

$$T_i^* = T_a^* \quad \text{on } \Gamma \quad (\text{S.D1.4})$$

$$k_i^* \mathbf{grad}^* T_i^* \cdot \mathbf{n}_i - k_a^* \mathbf{grad}^* T_a^* \cdot \mathbf{n}_i = L_{sg}^* \frac{D_v^*}{\rho_i^*} \mathbf{grad}^* \rho_v^* \cdot \mathbf{n}_i \quad \text{on } \Gamma \quad (\text{S.D1.5})$$

385

$$D_v^* \mathbf{grad}^* \rho_v^* \cdot \mathbf{n}_i = \varepsilon^{-1} \rho_i^* \mathbf{w}^* \cdot \mathbf{n}_i \quad \text{on } \Gamma \quad (\text{S.D1.6})$$

This set of equations is completed by the Hertz-Knudsen equation (10) and the Clausius Clapeyron's law (9) expressed in dimensionless form as:

$$w_n^* = \mathbf{w}^* \cdot \mathbf{n}_i = \frac{\alpha^*}{\rho_i^*} w_k^* [\rho_v^* - \rho_{vs}^*(T_a^*)] \quad \text{on } \Gamma \quad (\text{S.D1.7})$$

390

$$\rho_{vs}^*(T_a^*) = \rho_{vs}^{\text{ref}*}(T^{\text{ref}*}) \exp \left[ \frac{L_{sg}^* m^*}{\rho_i^* k^*} \left( \frac{1}{T^{\text{ref}*}} - \frac{1}{T_a^*} \right) \right] \quad (\text{S.D1.8})$$

#### S.4.1.1 Heat transfer and water vapor transfer at the first and the second order

Introducing asymptotic expansions for  $T_i^*$  and  $T_a^*$  in the relations (S.D1.1), (S.D1.2), (S.D1.4), and (S.D1.5) gives at the lowest order:

$$395 \quad \text{div}_{y^*}(k_i^* \mathbf{grad}_{y^*} T_i^{*(0)}) = 0 \quad \text{in } \Omega_i \quad (\text{S.D1.9})$$

$$\text{div}_{y^*}(k_a^* \mathbf{grad}_{y^*} T_a^{*(0)}) = 0 \quad \text{in } \Omega_a \quad (\text{S.D1.10})$$

$$T_i^{*(0)} = T_a^{*(0)} \quad \text{on } \Gamma \quad (\text{S.D1.11})$$

400

$$(k_i^* \mathbf{grad}_{y^*} T_i^{*(0)} - k_a^* \mathbf{grad}_{y^*} T_a^{*(0)}) \cdot \mathbf{n}_i = L_{sg}^* \frac{D_v^*}{\rho_i^*} \mathbf{grad}_{y^*} \rho_v^{*(0)} \quad \text{on } \Gamma \quad (\text{S.D1.12})$$

where the unknowns  $T_i^{*(0)}(\mathbf{x}^*, \mathbf{y}^*, t)$  and  $T_a^{*(0)}(\mathbf{x}^*, \mathbf{y}^*, t)$  are  $\mathbf{y}^*$ -periodic. Introducing asymptotic expansions for  $\rho_v^*$  in the relations (S.D1.3, S.D1.6) gives at the lowest order:

$$\text{div}_{y^*}(D_v^* \mathbf{grad}_{y^*} \rho_v^{*(0)}) = 0 \quad \text{in } \Omega_a \quad (\text{S.D1.13})$$

$$\rho_v^{*(0)} = \rho_{vs}^{*(0)}(T^{*(0)}) \quad \text{on } \Gamma \quad (\text{S.D1.14})$$

where the unknown  $\rho_v^{*(0)}(\mathbf{x}^*, \mathbf{y}^*, t)$  is  $\mathbf{y}^*$ -periodic. The solution of the above boundary value problems is given by:

$$\rho_v^{*(0)} = \rho_v^{*(0)}(\mathbf{x}^*, t) = \rho_{vs}^{*(0)}(T^{*(0)}) \quad (\text{S.D1.15})$$

$$410 \quad T_i^{*(0)} = T_a^{*(0)} = T^{*(0)}(\mathbf{x}^*, t) \quad (\text{S.D1.16})$$

At the first order, the temperature and the water vapor density are independent of the microscopic dimensionless variable  $\mathbf{y}^*$ . We have only one temperature field. Taking these results into account, Eq. (S.D1.1), (S.D1.2), (S.D1.4), and (S.D1.5) of order  $\varepsilon$  give the following second-order problem:

$$\text{div}_{y^*}(k_i^*(\mathbf{grad}_{y^*} T_i^{*(1)} + \mathbf{grad}_{x^*} T^{*(0)})) = 0 \quad \text{in } \Omega_i \quad (\text{S.D1.17})$$

415

$$\text{div}_{y^*}(k_a^*(\mathbf{grad}_{y^*} T_a^{*(1)} + \mathbf{grad}_{x^*} T^{*(0)})) = 0 \quad \text{in } \Omega_a \quad (\text{S.D1.18})$$

$$T_i^{*(1)} = T_a^{*(1)} \quad \text{on } \Gamma \quad (\text{S.D1.19})$$

$$420 \quad (k_i^*(\mathbf{grad}_{y^*} T_i^{*(1)} + \mathbf{grad}_{x^*} T^{*(0)}) - k_a^*(\mathbf{grad}_{y^*} T_a^{*(1)} + \mathbf{grad}_{x^*} T^{*(0)})) \cdot \mathbf{n}_i = \quad (\text{S.D1.20})$$

$$L_{sg}^* \frac{D_v^*}{\rho_i^*} (\mathbf{grad}_{y^*} \rho_v^{*(1)} + \mathbf{grad}_{x^*} \rho_v^{*(0)}) \cdot \mathbf{n}_i \quad \text{on } \Gamma$$

where the unknowns  $T_i^{*(1)}(\mathbf{x}^*, \mathbf{y}^*, t)$  and  $T_a^{*(1)}(\mathbf{x}^*, \mathbf{y}^*, t)$  are  $\mathbf{y}^*$ -periodic and the macroscopic gradient  $\mathbf{grad}_{x^*} T^{*(0)}$  is given. Moreover we have the second-order problem for Eq. (S.D1.3) and (S.D1.6) is written:

$$425 \quad \text{div}_{y^*}(D_v^*(\mathbf{grad}_{y^*} \rho_v^{*(1)} + \mathbf{grad}_{x^*} \rho_{vs}^{*(0)})) = 0 \quad \text{in } \Omega_a \quad (\text{S.D1.21})$$

$$\rho_v^{*(1)} = \rho_{vs}^{*(1)} \quad \text{on } \Gamma \quad (\text{S.D1.22})$$

where the unknowns  $\rho_v^{*(1)}(\mathbf{x}^*, \mathbf{y}^*, t)$  is  $\mathbf{y}^*$ -periodic. According to (S.A.40), this latter boundary condition can be also written

$$\rho_v^{*(1)} = \rho_{vs}^{*(1)} = \gamma^*(T^{*(0)}) T_a^{*(1)} \quad \text{on } \Gamma \quad (\text{S.D1.23})$$

430 Moreover, we have

$$\mathbf{grad}_{x^*} \rho_{vs}^{*(0)} = \gamma^*(T^{*(0)}) \mathbf{grad}_{x^*} T^{*(0)} \quad (\text{S.D1.24})$$

thus Eq. (S.D1.21) and (S.D1.23) are written:

$$\text{div}_{y^*}(D_v^*(\mathbf{grad}_{y^*} \rho_v^{*(1)} + \gamma^*(T^{*(0)}) \mathbf{grad}_{x^*} T^{*(0)})) = 0 \quad \text{in } \Omega_a \quad (\text{S.D1.25})$$



$$435 \quad \rho_v^{*(1)} = \gamma^*(T^{*(0)})T_a^{*(1)} \quad \text{on } \Gamma \quad (\text{S.D1.26})$$

The solution of the above boundary value problems (S.D1.17)-(S.D1.20) and (S.D1.25)-(S.D1.26) appears as a linear function of the macroscopic gradient  $\mathbf{grad}_{x^*}T^{*(0)}$ , modulo an arbitrary function.

$$T_i^{*(1)}(\mathbf{x}^*, \mathbf{y}^*, t) = \mathbf{r}_i^*(\mathbf{y}^*) \cdot \mathbf{grad}_{x^*}T^{*(0)} + \tilde{T}_i^{*(1)} \quad (\text{S.D1.27})$$

$$440 \quad T_a^{*(1)}(\mathbf{x}^*, \mathbf{y}^*, t) = \mathbf{r}_a^*(\mathbf{y}^*) \cdot \mathbf{grad}_{x^*}T^{*(0)} + \tilde{T}_a^{*(1)} \quad (\text{S.D1.28})$$

$$\rho_v^{*(1)}(\mathbf{x}^*, \mathbf{y}^*, t) = \gamma^*(T^{*(0)})\mathbf{r}_a^*(\mathbf{y}^*) \cdot \mathbf{grad}_{x^*}T^{*(0)} + \tilde{T}_a^{*(1)} \quad \text{on } \Gamma \quad (\text{S.D1.29})$$

where  $\mathbf{r}_i^*(\mathbf{y}^*)$  and  $\mathbf{r}_a^*(\mathbf{y}^*)$  are two periodic vectors which characterize the fluctuation of temperature in both phases at the pore scale. Introducing (S.D1.27) and (S.D1.28) in the set (S.D1.17)-(S.D1.20), these two vectors are solution of the following

445 boundary value problem in a compact form:

$$\text{div}_{y^*}(k_i^*(\mathbf{grad}_{y^*}\mathbf{r}_i^* + \mathbf{I})) = 0 \quad \text{in } \Omega_i \quad (\text{S.D1.30})$$

$$\text{div}_{y^*}\left((k_a^* + L_{sg}^*D_v^*\frac{\gamma^*(T^{*(0)})}{\rho_i^*})\mathbf{grad}_{y^*}\mathbf{r}_a^* + \mathbf{I}\right) = 0 \quad \text{in } \Omega_a \quad (\text{S.D1.31})$$

$$450 \quad \mathbf{r}_i^* = \mathbf{r}_a^* \quad \text{on } \Gamma \quad (\text{S.D1.32})$$

$$(k_i^*(\mathbf{grad}_{y^*}\mathbf{r}_i^* + \mathbf{I}) - (k_a^* + L_{sg}^*D_v^*\frac{\gamma^*(T^{*(0)})}{\rho_i^*})\mathbf{grad}_{y^*}\mathbf{r}_a^* + \mathbf{I}) \cdot \mathbf{n}_i = 0 \quad \text{on } \Gamma \quad (\text{S.D1.33})$$

$$\frac{1}{|\Omega|} \int_{\Omega} (\mathbf{r}_a^* + \mathbf{r}_i^*)d\Omega = \mathbf{0} \quad (\text{S.D1.34})$$

455 This latter equation is introduced to ensure the uniqueness of the solution. This latter boundary value problem is similar to the one of the Eq. (S.A.20)-(S.A.24) where  $k_a^*$  is now equal to  $k_a^* + L_{sg}^*D_v^*\gamma^*(T^{*(0)})/\rho_i^*$ . At the local scale, the thermal conductivity appears to be enhanced by the phase change.

### S.4.1.2 Macroscopic description

Finally, the third order problem is given by the equations (S.D1.1, S.D1.2, S.D1.4, S.D1.5) of order  $\varepsilon^2$ :

$$460 \quad \rho_i^*C_i^*\frac{\partial T^{*(0)}}{\partial t^*} - \text{div}_{y^*}(k_i^*(\mathbf{grad}_{y^*}T_i^{*(2)} + \mathbf{grad}_{x^*}T_i^{*(1)})) - \text{div}_{x^*}(k_i^*(\mathbf{grad}_{y^*}T_i^{*(1)} + \mathbf{grad}_{x^*}T^{*(0)})) = 0 \quad \text{in } \Omega_i \quad (\text{S.D1.35})$$

$$\rho_a^*C_a^*\frac{\partial T^{*(0)}}{\partial t^*} - \text{div}_{y^*}(k_a^*(\mathbf{grad}_{y^*}T_a^{*(2)} + \mathbf{grad}_{x^*}T_a^{*(1)})) - \text{div}_{x^*}(k_a^*(\mathbf{grad}_{y^*}T_a^{*(1)} + \mathbf{grad}_{x^*}T^{*(0)})) = 0 \quad \text{in } \Omega_a \quad (\text{S.D1.36})$$

$$T_i^{*(2)} = T_a^{*(2)} \quad \text{on } \Gamma \quad (\text{S.D1.37})$$

465

$$(k_i^*(\mathbf{grad}_{y^*} T_i^{*(2)} + \mathbf{grad}_{x^*} T_i^{*(1)}) - k_a^*(\mathbf{grad}_{y^*} T_a^{*(2)} + \mathbf{grad}_{x^*} T_a^{*(1)})) \cdot \mathbf{n}_i = \quad (\text{S.D1.38})$$

$$L_{sg} \frac{D_v^*}{\rho_i^*} (\mathbf{grad}_{y^*} \rho_v^{*(2)} + \mathbf{grad}_{x^*} \rho_v^{*(1)}) \cdot \mathbf{n}_i \quad \text{on } \Gamma$$

470 where the unknowns  $T_i^{*(2)}(\mathbf{x}^*, \mathbf{y}^*, t)$  and  $T_a^{*(2)}(\mathbf{x}^*, \mathbf{y}^*, t)$  are  $\mathbf{y}^*$ -periodic. For the water vapor, the third order problem is given by the the equations (S.D1.3, S.D1.6) of order  $\varepsilon^2$ :

$$\frac{\partial \rho_{vs}^{*(0)}}{\partial t^*} - \text{div}_{y^*} (D_v^* (\mathbf{grad}_{y^*} \rho_v^{*(2)} + \mathbf{grad}_{x^*} \rho_v^{*(1)})) - \text{div}_{x^*} (D_v^* (\mathbf{grad}_{y^*} \rho_v^{*(1)} + \mathbf{grad}_{x^*} \rho_{vs}^{*(0)}(T^{*(0)}))) = 0 \quad \text{in } \Omega_a \quad (\text{S.D1.39})$$

$$D_v^* (\mathbf{grad}_{y^*} \rho_v^{*(2)} + \mathbf{grad}_{x^*} \rho_v^{*(1)}) \cdot \mathbf{n}_i = \rho_i^* w_n^{*(3)} \quad \text{on } \Gamma \quad (\text{S.D1.40})$$

475 Integrating (S.D1.35) over  $\Omega_i$  and (S.D1.36) and (S.D1.39) over  $\Omega_a$ , and then using the divergence theorem, the periodicity condition, and the interface conditions (S.C.41) leads to the first order dimensionless description:

$$(\rho C)^{\text{eff}*} \frac{\partial T^{*(0)}}{\partial t^*} - \text{div}_{x^*} (\mathbf{k}^{\text{D}*} \mathbf{grad}_{x^*} T^{*(0)}) = \int_{\Gamma} L_{sg} \frac{D_v^*}{\rho_i^*} (\mathbf{grad}_{y^*} \rho_v^{*(2)} + \mathbf{grad}_{x^*} \rho_v^{*(1)}) \cdot \mathbf{n}_i dS = -L_{sg} \dot{\phi} \quad (\text{S.D1.41})$$

where  $(\rho C)^{\text{eff}*}$  and  $\mathbf{k}^{\text{D}*}$  are the dimensionless effective thermal capacity and the apparent dimensionless conductivity respectively, defined as:

$$(\rho C)^{\text{eff}*} = (1 - \phi) \rho_i^* C_i^* + \phi \rho_a^* C_a^* \quad (\text{S.D1.42})$$

480

$$\mathbf{k}^{\text{D}*} = \frac{1}{|\Omega|} \left( \int_{\Omega_a} k_a^* (\mathbf{grad}_{y^*} \mathbf{r}_a^*(\mathbf{y}^*) + \mathbf{I}) d\Omega + \int_{\Omega_i} k_i^* (\mathbf{grad}_{y^*} \mathbf{r}_i^*(\mathbf{y}^*) + \mathbf{I}) d\Omega \right) \quad (\text{S.D1.43})$$

where  $\phi$  is the porosity. Integrating (S.D1.39) over  $\Omega_a$ , and then using the divergence theorem and the periodicity condition, leads to the first order dimensionless description:

$$\phi \frac{\partial \rho_{vs}^{*(0)}}{\partial t} - \text{div}_{x^*} (\mathbf{D}^{\text{D}*} \mathbf{grad}_{x^*} \rho_{vs}^{*(0)}(T^{*(0)})) = - \int_{\Gamma} D_v^* (\mathbf{grad}_{y^*} \rho_v^{*(2)} + \mathbf{grad}_{x^*} \rho_v^{*(1)}) \cdot \mathbf{n}_i dS = \rho_i^* \dot{\phi} \quad (\text{S.D1.44})$$

485 where  $\mathbf{D}^{\text{D}*}$  is the apparent effective diffusion tensor defined as:

$$\mathbf{D}^{\text{D}*} = \frac{1}{|\Omega|} \int_{\Omega_a} D_v^* (\mathbf{grad}_{y^*} \mathbf{r}_a^*(\mathbf{y}^*) + \mathbf{I}) d\Omega \quad (\text{S.D1.45})$$

## S.4.2 Case D2

Taking into account the order of magnitude of the dimensionless numbers,  $[F_i^T] = \mathcal{O}([F_a^T]) = \mathcal{O}([F_a^\rho]) = \mathcal{O}(\varepsilon^2)$ ,  $[K] = \mathcal{O}(1)$ ,  $[W_R] = \mathcal{O}(\varepsilon^{-1})$ ,  $[H] = \mathcal{O}(1)$ , the dimensionless microscopic description (13)-(18) becomes:

$$490 \quad \varepsilon^2 \rho_i^* C_i^* \frac{\partial T_i^*}{\partial t^*} - \text{div}^*(k_i^* \mathbf{grad}^* T_i^*) = 0 \quad \text{in } \Omega_i \quad (\text{S.D2.1})$$

$$\varepsilon^2 \rho_a^* C_a^* \frac{\partial T_a^*}{\partial t^*} - \text{div}^*(k_a^* \mathbf{grad}^* T_a^*) = 0 \quad \text{in } \Omega_a \quad (\text{S.D2.2})$$

$$\varepsilon^2 \frac{\partial \rho_v^*}{\partial t^*} - \text{div}^*(D_v^* \mathbf{grad}^* \rho_v^*) = 0 \quad \text{in } \Omega_a \quad (\text{S.D2.3})$$

495

$$T_i^* = T_a^* \quad \text{on } \Gamma \quad (\text{S.D2.4})$$

$$k_i^* \mathbf{grad}^* T_i^* \cdot \mathbf{n}_i - k_a^* \mathbf{grad}^* T_a^* \cdot \mathbf{n}_i = L_{sg}^* \frac{D_v^*}{\rho_i^*} \mathbf{grad}^* \rho_v^* \cdot \mathbf{n}_i \quad \text{on } \Gamma \quad (\text{S.D2.5})$$

$$500 \quad D_v^* \mathbf{grad}^* \rho_v^* \cdot \mathbf{n}_i = \varepsilon^{-2} \rho_i^* \mathbf{w}^* \cdot \mathbf{n}_i \quad \text{on } \Gamma \quad (\text{S.D2.6})$$

This set of equations is completed by the Hertz-Knudsen equation (S.A.7) and the Clausius Clapeyron's law (9) expressed in dimensionless form as:

$$w_n^* = \mathbf{w}^* \cdot \mathbf{n}_i = \frac{\alpha^*}{\rho_i^*} w_k^* [\rho_v^* - \rho_{vs}^*(T_a^*)] \quad \text{on } \Gamma \quad (\text{S.D2.7})$$

$$505 \quad \rho_{vs}^*(T_a^*) = \rho_{vs}^{\text{ref}*}(T^{\text{ref}*}) \exp \left[ \frac{L_{sg}^* m^*}{\rho_i^* k^*} \left( \frac{1}{T^{\text{ref}*}} - \frac{1}{T_a^*} \right) \right] \quad (\text{S.D2.8})$$

### S.4.2.1 Heat transfer and water vapor transfer at the first and second order

Introducing asymptotic expansions for  $T_i^*$  and  $T_a^*$  in the relations (S.D2.1, S.D2.2, S.D2.4, S.D2.5) gives at the lowest order:

$$\text{div}_{y^*}(k_i^* \mathbf{grad}_{y^*} T_i^{*(0)}) = 0 \quad \text{in } \Omega_i \quad (\text{S.D2.9})$$

$$510 \quad \text{div}_{y^*}(k_a^* \mathbf{grad}_{y^*} T_a^{*(0)}) = 0 \quad \text{in } \Omega_a \quad (\text{S.D2.10})$$

$$T_i^{*(0)} = T_a^{*(0)} \quad \text{on } \Gamma \quad (\text{S.D2.11})$$

$$(k_i^* \mathbf{grad}_{y^*} T_i^{*(0)} - k_a^* \mathbf{grad}_{y^*} T_a^{*(0)}) \cdot \mathbf{n}_i = L_{sg}^* \frac{D_v^*}{\rho_i^*} \mathbf{grad}_{y^*} \rho_v^{*(0)} \quad \text{on } \Gamma \quad (\text{S.D2.12})$$

515 where the unknowns  $T_i^{*(0)}(\mathbf{x}^*, \mathbf{y}^*, t)$  and  $T_a^{*(0)}(\mathbf{x}^*, \mathbf{y}^*, t)$  are  $\mathbf{y}^*$ -periodic. Introducing asymptotic expansions for  $\rho_v^*$  in the relations (S.D2.3, S.D2.6) gives at the lowest order

$$\operatorname{div}_{y^*}(D_v^* \mathbf{grad}_{y^*} \rho_v^{*(0)}) = 0 \quad \text{in } \Omega_a \quad (\text{S.D2.13})$$

$$\rho_v^{*(0)} = \rho_{vs}^{*(0)}(T^{*(0)}) \quad \text{on } \Gamma \quad (\text{S.D2.14})$$

520 where the unknowns  $\rho_v^{*(0)}(\mathbf{x}^*, \mathbf{y}^*, t)$  is  $\mathbf{y}^*$ -periodic. The solution of the above boundary value problems is given by:

$$\rho_v^{*(0)} = \rho_v^{*(0)}(\mathbf{x}^*, t) = \rho_{vs}^{*(0)}(T^{*(0)}) \quad (\text{S.D2.15})$$

$$T_i^{*(0)} = T_a^{*(0)} = T^{*(0)}(\mathbf{x}^*, t) \quad (\text{S.D2.16})$$

At the first order, the temperature and the water vapor density are independent of the microscopic dimensionless variable  $\mathbf{y}^*$ .  
 525 We have only one temperature field. Taking these results into account, equations (S.D2.1, S.D2.2, S.D2.4, S.D2.5) of order  $\varepsilon$  give the following second-order problem:

$$\operatorname{div}_{y^*}(k_i^*(\mathbf{grad}_{y^*} T_i^{*(1)} + \mathbf{grad}_{x^*} T^{*(0)})) = 0 \quad \text{in } \Omega_i \quad (\text{S.D2.17})$$

$$\operatorname{div}_{y^*}(k_a^*(\mathbf{grad}_{y^*} T_a^{*(1)} + \mathbf{grad}_{x^*} T^{*(0)})) = 0 \quad \text{in } \Omega_a \quad (\text{S.D2.18})$$

530

$$T_i^{*(1)} = T_a^{*(1)} \quad \text{on } \Gamma \quad (\text{S.D2.19})$$

$$(k_i^*(\mathbf{grad}_{y^*} T_i^{*(1)} + \mathbf{grad}_{x^*} T^{*(0)}) - k_a^*(\mathbf{grad}_{y^*} T_a^{*(1)} + \mathbf{grad}_{x^*} T^{*(0)})) \cdot \mathbf{n}_i = \quad (\text{S.D2.20})$$

535

$$L_{sg}^* \frac{D_v^*}{\rho_i^*} (\mathbf{grad}_{y^*} \rho_v^{*(1)} + \mathbf{grad}_{x^*} \rho_v^{*(0)}) \cdot \mathbf{n}_i \quad \text{on } \Gamma$$

where the unknowns  $T_i^{*(1)}(\mathbf{x}^*, \mathbf{y}^*, t)$  and  $T_a^{*(1)}(\mathbf{x}^*, \mathbf{y}^*, t)$  are  $\mathbf{y}^*$ -periodic and the macroscopic gradient  $\mathbf{grad}_{x^*} T^{*(0)}$  is given. Moreover we have the second-order problem for the equations (S.D2.3, S.D2.6) is written:

$$\operatorname{div}_{y^*}(D_v^*(\mathbf{grad}_{y^*} \rho_v^{*(1)} + \mathbf{grad}_{x^*} \rho_{vs}^{*(0)})) = 0 \quad \text{in } \Omega_a \quad (\text{S.D2.21})$$

$$540 \quad \rho_v^{*(1)} = \rho_{vs}^{*(1)} \quad \text{on } \Gamma \quad (\text{S.D2.22})$$

where the unknowns  $\rho_v^{*(1)}(\mathbf{x}^*, \mathbf{y}^*, t)$  is  $\mathbf{y}^*$ -periodic. According to (S.A.40), this latter boundary condition can be also written

$$\rho_v^{*(1)} = \rho_{vs}^{*(1)} = \gamma^*(T^{*(0)}) T_a^{*(1)} \quad \text{on } \Gamma \quad (\text{S.D2.23})$$

Moreover, we have

$$\mathbf{grad}_{x^*} \rho_{vs}^{*(0)} = \gamma^*(T^{*(0)}) \mathbf{grad}_{x^*} T^{*(0)} \quad (\text{S.D2.24})$$

545 thus equations (S.D2.21) and (S.D2.23) are written:

$$\operatorname{div}_{y^*}(D_v^*(\mathbf{grad}_{y^*}\rho_v^{*(1)} + \gamma^*(T^{*(0)})\mathbf{grad}_{x^*}T^{*(0)}) = 0 \quad \text{in } \Omega_a \quad (\text{S.D2.25})$$

$$\rho_v^{*(1)} = \gamma^*(T^{*(0)})T_a^{*(1)} \quad \text{on } \Gamma \quad (\text{S.D2.26})$$

As in the Cases C1 and C2, the solution of the above boundary value problems (S.D2.17-S.D2.20) and (S.D2.25-S.D2.26) appears as a linear function of the macroscopic gradient  $\mathbf{grad}_{x^*}T^{*(0)}$ , modulo an arbitrary function.

$$T_i^{*(1)}(\mathbf{x}^*, \mathbf{y}^*, t) = \mathbf{r}_i^*(\mathbf{y}^*) \cdot \mathbf{grad}_{x^*}T^{*(0)} + \tilde{T}_i^{*(1)} \quad (\text{S.D2.27})$$

$$T_a^{*(1)}(\mathbf{x}^*, \mathbf{y}^*, t) = \mathbf{r}_a^*(\mathbf{y}^*) \cdot \mathbf{grad}_{x^*}T^{*(0)} + \tilde{T}_a^{*(1)} \quad (\text{S.D2.28})$$

$$555 \quad \rho_v^{*(1)}(\mathbf{x}^*, \mathbf{y}^*, t) = \gamma^*(T^{*(0)})(\mathbf{r}_a^*(\mathbf{y}^*) \cdot \mathbf{grad}_{x^*}T^{*(0)} + \tilde{T}_a^{*(1)}) \quad \text{on } \Gamma \quad (\text{S.D2.29})$$

where  $\mathbf{r}_i^*(\mathbf{y}^*)$  and  $\mathbf{r}_a^*(\mathbf{y}^*)$  are two periodic vectors which characterize the fluctuation of temperature in both phases at the pore scale. Introducing (S.D2.27) and (S.D2.28) in the set (S.D2.17-S.D2.20), these two vectors are solution of the following boundary value problem in a compact form:

$$\operatorname{div}_{y^*}(k_i^*(\mathbf{grad}_{y^*}\mathbf{r}_i^* + \mathbf{I})) = 0 \quad \text{in } \Omega_i \quad (\text{S.D2.30})$$

560

$$\operatorname{div}_{y^*}((k_a^* + L_{sg}^*D_v^*\frac{\gamma^*(T^{*(0)})}{\rho_i^*})(\mathbf{grad}_{y^*}\mathbf{r}_a^* + \mathbf{I})) = 0 \quad \text{in } \Omega_a \quad (\text{S.D2.31})$$

$$\mathbf{r}_i^* = \mathbf{r}_a^* \quad \text{on } \Gamma \quad (\text{S.D2.32})$$

$$565 \quad (k_i^*(\mathbf{grad}_{y^*}\mathbf{r}_i^* + \mathbf{I}) - (k_a^* + L_{sg}^*D_v^*\frac{\gamma^*(T^{*(0)})}{\rho_i^*})(\mathbf{grad}_{y^*}\mathbf{r}_a^* + \mathbf{I})) \cdot \mathbf{n}_i = 0 \quad \text{on } \Gamma \quad (\text{S.D2.33})$$

$$\frac{1}{|\Omega|} \int_{\Omega} (\mathbf{r}_a^* + \mathbf{r}_i^*) d\Omega = \mathbf{0} \quad (\text{S.D2.34})$$

This latter equation is introduced to ensure the uniqueness of the solution. This latter boundary value problem is similar to the one of the Eq. (S.A.20)-(S.A.24) where  $k_a^*$  is now equal to  $k_a^* + L_{sg}^*D_v^*\gamma^*(T^{*(0)})/\rho_i^*$ . At the local scale, the thermal conductivity appears to be enhanced by the phase change.

570

### S.4.2.2 Macroscopic description

Finally, the third order problem is given by Eq. (S.D2.1), (S.D2.2), (S.D2.4), and (S.D2.5) of order  $\varepsilon^2$ :

$$\rho_i^* C_i^* \frac{\partial T^{*(0)}}{\partial t^*} - \operatorname{div}_{y^*} (k_i^* (\mathbf{grad}_{y^*} T_i^{*(2)} + \mathbf{grad}_{x^*} T_i^{*(1)})) - \operatorname{div}_{x^*} (k_i^* (\mathbf{grad}_{y^*} T_i^{*(1)} + \mathbf{grad}_{x^*} T^{*(0)})) = 0 \quad \text{in } \Omega_i \quad (\text{S.D2.35})$$

$$575 \quad \rho_a^* C_a^* \frac{\partial T^{*(0)}}{\partial t^*} - \operatorname{div}_{y^*} (k_a^* (\mathbf{grad}_{y^*} T_a^{*(2)} + \mathbf{grad}_{x^*} T_a^{*(1)})) - \operatorname{div}_{x^*} (k_a^* (\mathbf{grad}_{y^*} T_a^{*(1)} + \mathbf{grad}_{x^*} T^{*(0)})) = 0 \quad \text{in } \Omega_a \quad (\text{S.D2.36})$$

$$T_i^{*(2)} = T_a^{*(2)} \quad \text{on } \Gamma \quad (\text{S.D2.37})$$

$$580 \quad (k_i^* (\mathbf{grad}_{y^*} T_i^{*(2)} + \mathbf{grad}_{x^*} T_i^{*(1)}) - k_a^* (\mathbf{grad}_{y^*} T_a^{*(2)} + \mathbf{grad}_{x^*} T_a^{*(1)})) \cdot \mathbf{n}_i = \quad (\text{S.D2.38})$$

$$L_{sg}^* \frac{D_v^*}{\rho_i^*} (\mathbf{grad}_{y^*} \rho_v^{*(2)} + \mathbf{grad}_{x^*} \rho_v^{*(1)}) \cdot \mathbf{n}_i \quad \text{on } \Gamma$$

where the unknowns  $T_i^{*(2)}(\mathbf{x}^*, \mathbf{y}^*, t)$  and  $T_a^{*(2)}(\mathbf{x}^*, \mathbf{y}^*, t)$  are  $\mathbf{y}^*$ -periodic. For the water vapor, the third order problem is given by Eq. (S.D2.3) and (S.D2.6) of order  $\varepsilon^2$ :

$$585 \quad \frac{\partial \rho_{vs}^{*(0)}}{\partial t^*} - \operatorname{div}_{y^*} (D_v^* (\mathbf{grad}_{y^*} \rho_v^{*(2)} + \mathbf{grad}_{x^*} \rho_v^{*(1)})) - \operatorname{div}_{x^*} (D_v^* (\mathbf{grad}_{y^*} \rho_v^{*(1)} + \mathbf{grad}_{x^*} \rho_{vs}^{*(0)} (T^{*(0)}))) = 0 \quad \text{in } \Omega_a \quad (\text{S.D2.39})$$

$$D_v^* (\mathbf{grad}_{y^*} \rho_v^{*(2)} + \mathbf{grad}_{x^*} \rho_v^{*(1)}) \cdot \mathbf{n}_i = \rho_i^* w_n^{*(4)} \quad \text{on } \Gamma \quad (\text{S.D2.40})$$

Integrating (S.D2.35) over  $\Omega_i$  and (S.D2.36) and (S.D2.39) over  $\Omega_a$ , and then using the divergence theorem, the periodicity condition, and the interface conditions (S.C.41) leads to the first order dimensionless description:

$$(\rho C)^{\text{eff}*} \frac{\partial T^{*(0)}}{\partial t^*} - \operatorname{div}_{x^*} (\mathbf{k}^{\text{D}*} \mathbf{grad}_{x^*} T^{*(0)}) = \int_{\Gamma} L_{sg}^* \frac{D_v^*}{\rho_i^*} (\mathbf{grad}_{y^*} \rho_v^{*(2)} + \mathbf{grad}_{x^*} \rho_v^{*(1)}) \cdot \mathbf{n}_i dS = -L_{sg}^* \dot{\phi} \quad (\text{S.D2.41})$$

590 where  $(\rho C)^{\text{eff}*}$  and  $\mathbf{k}^{\text{D}*}$  are the dimensionless effective thermal capacity and the apparent dimensionless thermal conductivity, respectively, defined as:

$$(\rho C)^{\text{eff}*} = (1 - \phi) \rho_i^* C_i^* + \phi \rho_a^* C_a^* \quad (\text{S.D2.42})$$

$$\mathbf{k}^{\text{D}*} = \frac{1}{|\Omega|} \left( \int_{\Omega_a} k_a^* (\mathbf{grad}_{y^*} \mathbf{r}_a^*(\mathbf{y}^*) + \mathbf{I}) d\Omega + \int_{\Omega_i} k_i^* (\mathbf{grad}_{y^*} \mathbf{r}_i^*(\mathbf{y}^*) + \mathbf{I}) d\Omega \right) \quad (\text{S.D2.43})$$

595 where  $\phi$  is the porosity. Integrating (S.D2.39) over  $\Omega_a$ , and then using the divergence theorem and the periodicity condition, leads to the first order dimensionless description:

$$\phi \frac{\partial \rho_{vs}^{*(0)}}{\partial t} - \operatorname{div}_{x^*} (\mathbf{D}^{\text{D}*} \mathbf{grad}_{x^*} \rho_{vs}^{*(0)} (T^{*(0)})) = - \int_{\Gamma} D_v^* (\mathbf{grad}_{y^*} \rho_v^{*(2)} + \mathbf{grad}_{x^*} \rho_v^{*(1)}) \cdot \mathbf{n}_i dS = \rho_i^* \dot{\phi} \quad (\text{S.D2.44})$$

where  $\mathbf{D}^{\text{D}*}$  is the apparent effective diffusion tensor defined as:

$$\mathbf{D}^{\text{D}*} = \frac{1}{|\Omega|} \int_{\Omega_a} D_v^* (\mathbf{grad}_{y^*} \mathbf{r}_a^*(\mathbf{y}^*) + \mathbf{I}) d\Omega \quad (\text{S.D2.45})$$

## 600 **References**

Auriault, J.-L., Boutin, C., and Geindreau, C.: Homogenization of coupled phenomena in heterogenous media, Wiley-ISTE, London, 2009.
